# Supplementary material for: Selective hydrogenation of 5-(hydroxymethyl)furfural to 5-methylfurfural over single atomic metals anchored on Nb2O5
Source: PubMed Central journal article supplement (PMC7838200; doi:10.1038/s41467-020-20878-7), 2021-01-26
Supplement: 41467_2020_20878_MOESM1_ESM.pdf [file 41467_2020_20878_MOESM1_ESM.pdf]

## Supporting Information

### Selective Hydrogenation of 5-(Hydroxymethyl)furfural to 5-Methylfurfural over Single Atomic Metals Anchored on Nb<sub>2</sub>O<sub>5</sub>

Shaopeng Li,<sup>1,2</sup> Minghua Dong,<sup>1,2</sup> Junjuan Yang,<sup>1</sup> Xiaomeng Cheng,<sup>1,2</sup> Xiaojun Shen,<sup>1,2</sup> Shulin Liu,<sup>1,2</sup> Zhi-Qiang Wang<sup>3\*</sup>, Xue-Qing Gong<sup>3\*</sup>, Huizhen Liu<sup>1,2,4\*</sup>, Buxing Han<sup>1,2,4\*</sup>

1. Beijing National Laboratory for Molecular Sciences, CAS Key Laboratory of Colloid and Interface and Thermodynamics, Institute of Chemistry, Chinese Academy of Sciences, Beijing 100190, China.

2. School of Chemistry and Chemical Engineering, University of Chinese Academy of Sciences, Beijing 100049, China.

3. Key Laboratory for Advanced Materials, Centre for Computational Chemistry and Research Institute of Industrial Catalysis, School of Chemistry and Molecular Engineering, East China University of Science and Technology, Shanghai 200237, China.

4. Physical Science Laboratory, Huairou National Comprehensive Science Center, Beijing 101407, China.

\*Correspondence to: zhiqiangwang@ecust.edu.cn (Zhi-Qiang Wang); xgong@ecust.edu.cn (Xue-Qing Gong); liuhz@iccas.ac.cn (Huizhen Liu); hanbx@iccas.ac.cn (Buxing Han).

Additional figures

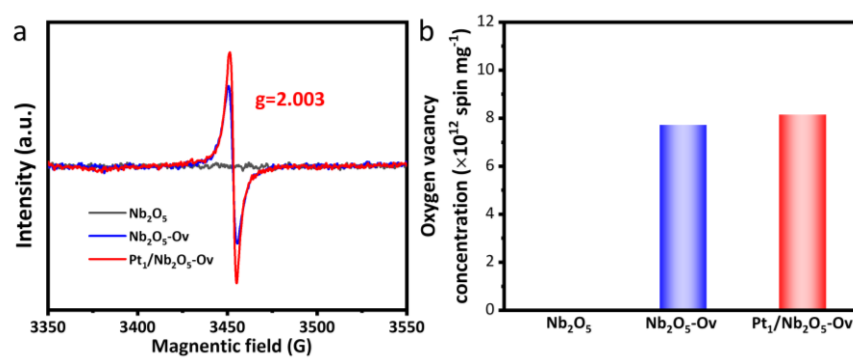

**Supplementary Fig. 1** Characterization results from electron-paramagnetic resonance spectra. (a) EPR of Nb<sub>2</sub>O<sub>5</sub>, Nb<sub>2</sub>O<sub>5</sub>-Ov and Pt<sub>1</sub>/Nb<sub>2</sub>O<sub>5</sub>-Ov. (b) Quantitative EPR analysis at room temperature. Data for the reduced samples were acquired under vacuum.

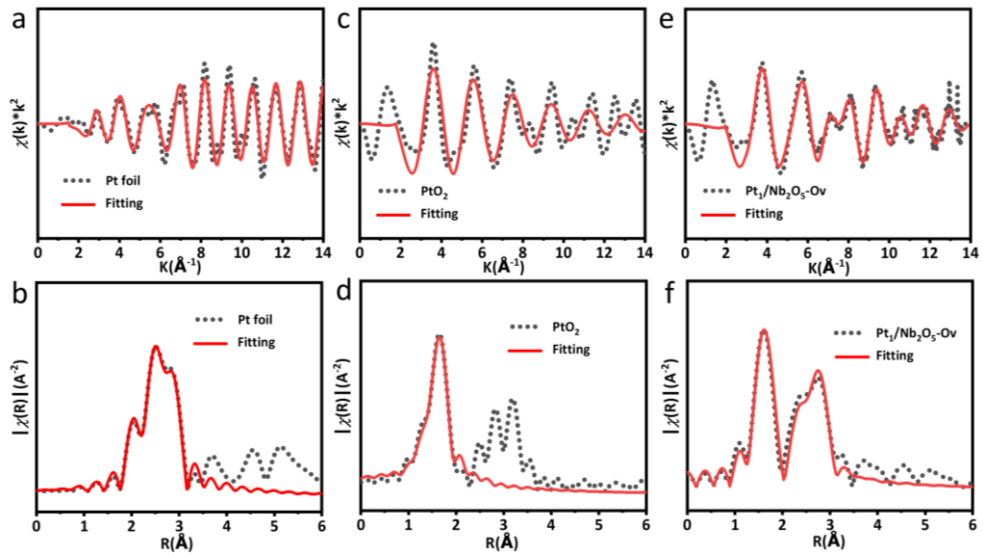

**Supplementary Fig. 2** Characterization results from EXAFS. (a, c, e) EXAFS in k space of Pt foil,  $\text{PtO}_2$ , and  $\text{Pt}_1/\text{Nb}_2\text{O}_5\text{-Ov}$ . (b, d, f) The corresponding EXAFS fitting of Pt foil,  $\text{PtO}_2$ , and  $\text{Pt}_1/\text{Nb}_2\text{O}_5\text{-Ov}$  at R space.

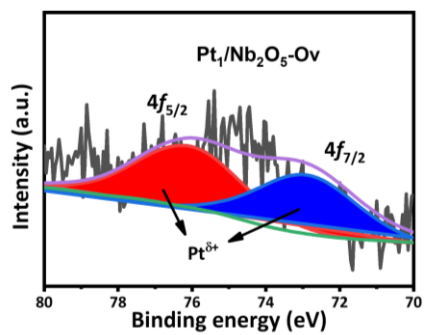

Supplementary Fig. 3 Characterization results from XPS. The Pt 4f of Pt<sub>1</sub>/Nb<sub>2</sub>O<sub>5</sub>-Ov.

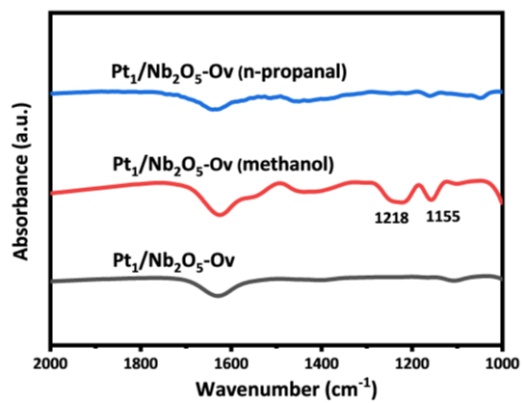

**Supplementary Fig. 4** Characterization results from FT-IR. FT-IR spectra of methanol and n-propanal adsorbed on Pt<sub>1</sub>/Nb<sub>2</sub>O<sub>5</sub>-Ov.

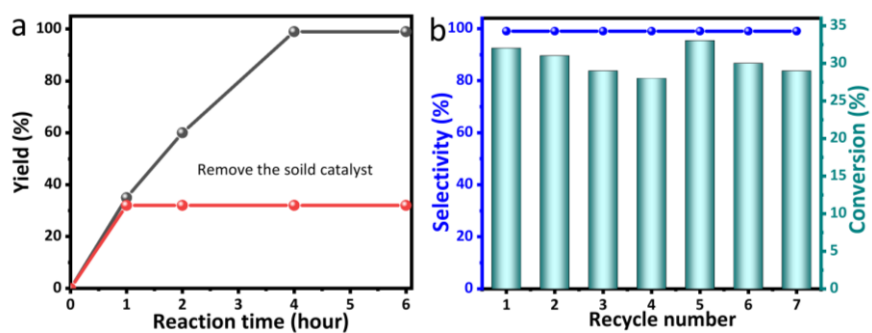

**Supplementary Fig. 5 Recycling test of the Pt<sub>1</sub>/Nb<sub>2</sub>O<sub>5</sub>-Ov catalyst.** (a) Time-yield plots for MF from selective hydrodeoxygenation of HMF over Pt<sub>1</sub>/Nb<sub>2</sub>O<sub>5</sub>-Ov (black line) or removing Pt<sub>1</sub>/Nb<sub>2</sub>O<sub>5</sub>-Ov after 1 h (red line); (b) Reusability of the Pt<sub>1</sub>/Nb<sub>2</sub>O<sub>5</sub>-Ov. Reaction conditions: HMF (0.3 mmol), catalyst (20 mg), solvent (THF 2 mL), reaction temperature (160°C), H<sub>2</sub> pressure (4.0 MPa), reaction time (1 h), stirring speed (600 rpm).

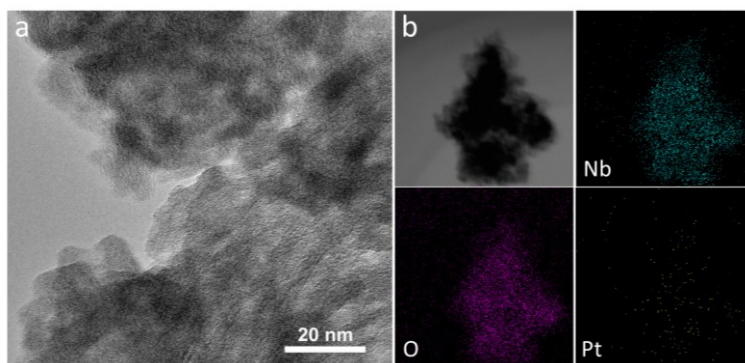

**Supplementary Fig. 6** The HR-TEM image and corresponding EDS pattern of Pt<sub>1</sub>/Nb<sub>2</sub>O<sub>5</sub>-Ov. (a) TEM images of the used Pt<sub>1</sub>/Nb<sub>2</sub>O<sub>5</sub>-Ov. (b) EDS mapping images of the used Pt<sub>1</sub>/Nb<sub>2</sub>O<sub>5</sub>-Ov.

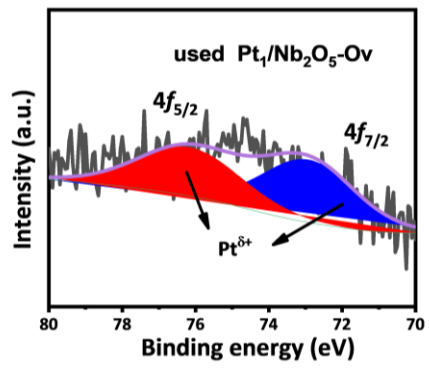

Supplementary Fig. 7 Characterization results from XPS. The Pt 4f of the used Pt<sub>1</sub>/Nb<sub>2</sub>O<sub>5</sub>-Ov.



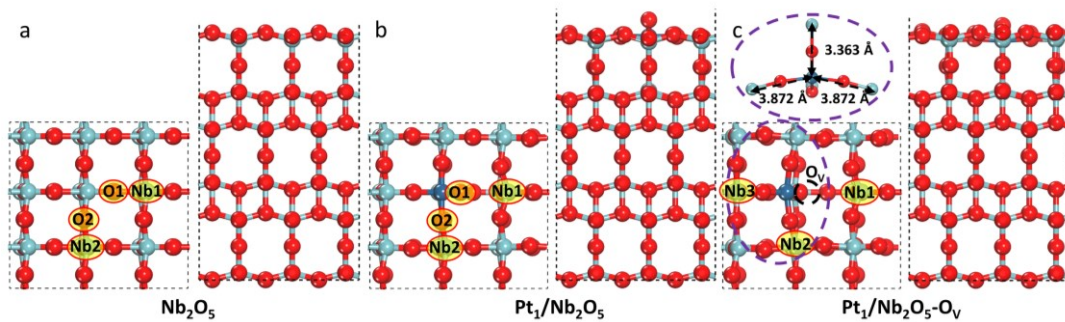

**Supplementary Fig. 8** Calculated structures of the stoichiometric. (a) Nb<sub>2</sub>O<sub>5</sub>, (b) Pt<sub>1</sub>/Nb<sub>2</sub>O<sub>5</sub>, (c) Pt<sub>1</sub>/Nb<sub>2</sub>O<sub>5</sub>-O<sub>v</sub> surfaces (Left: top view; Right: side view). Red: O, light blue: Nb, blue: Pt; the dotted circles label the missing oxygens (vacancies). These notations are used throughout the paper.

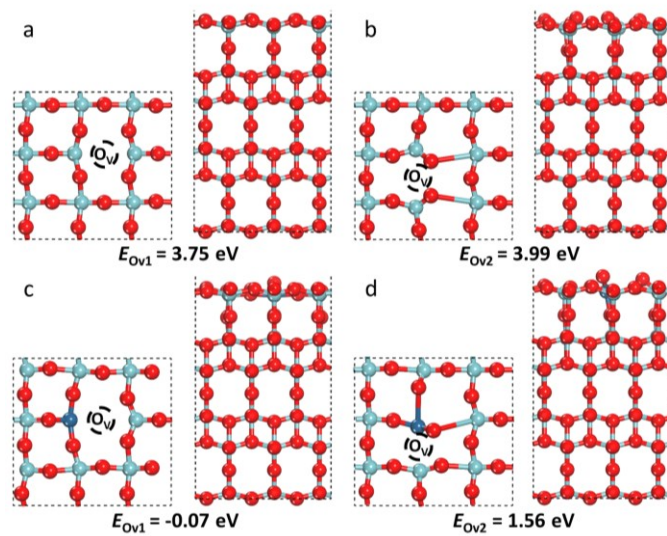

**Supplementary Fig. 9** Calculated structures and the oxygen vacancy energies. (a, b)  $\text{Nb}_2\text{O}_5$  and (c, d)  $\text{Pt}_1/\text{Nb}_2\text{O}_5$  surfaces. The dotted circles label the missing oxygens (vacancies). (Left: top view; Right: side view). Red: O, light blue: Nb, blue: Pt.

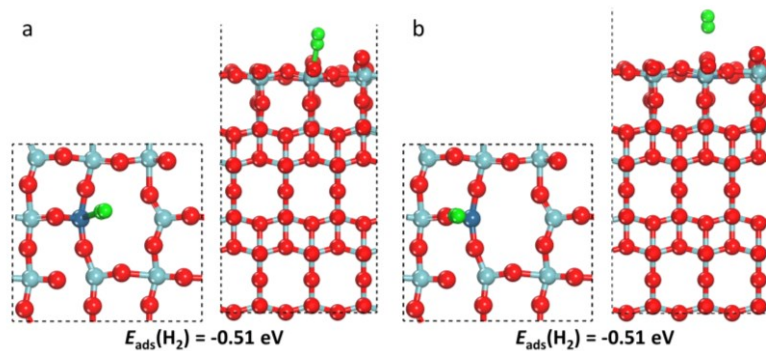

**Supplementary Fig. 10** Calculated adsorption energy and structures of H<sub>2</sub> on Pt<sub>1</sub>/Nb<sub>2</sub>O<sub>5</sub>-O<sub>v</sub> surfaces. (a) Pt site, (b) O site. (Left: top view; Right: side view). Red: O, light blue: Nb, blue: Pt, green: H.

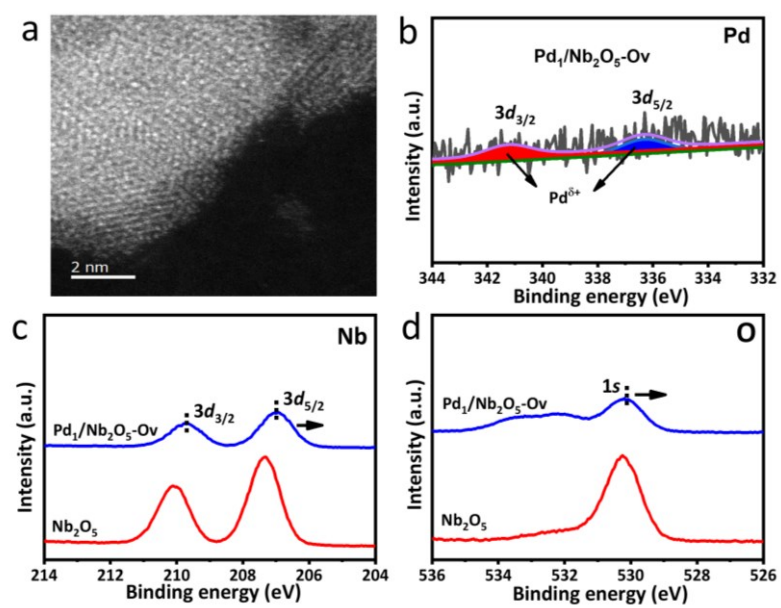

**Supplementary Fig. 11 AC-HAADF-STEM image and XPS pattern of Pd<sub>1</sub>/Nb<sub>2</sub>O<sub>5</sub>-Ov.** (a) AC-HAADF-STEM image of Pd<sub>1</sub>/Nb<sub>2</sub>O<sub>5</sub>-Ov. The XPS spectra of Pd 3d (b), Nb 3d (c) and O 1s (d) of Nb<sub>2</sub>O<sub>5</sub> and Pd<sub>1</sub>/Nb<sub>2</sub>O<sub>5</sub>-Ov.

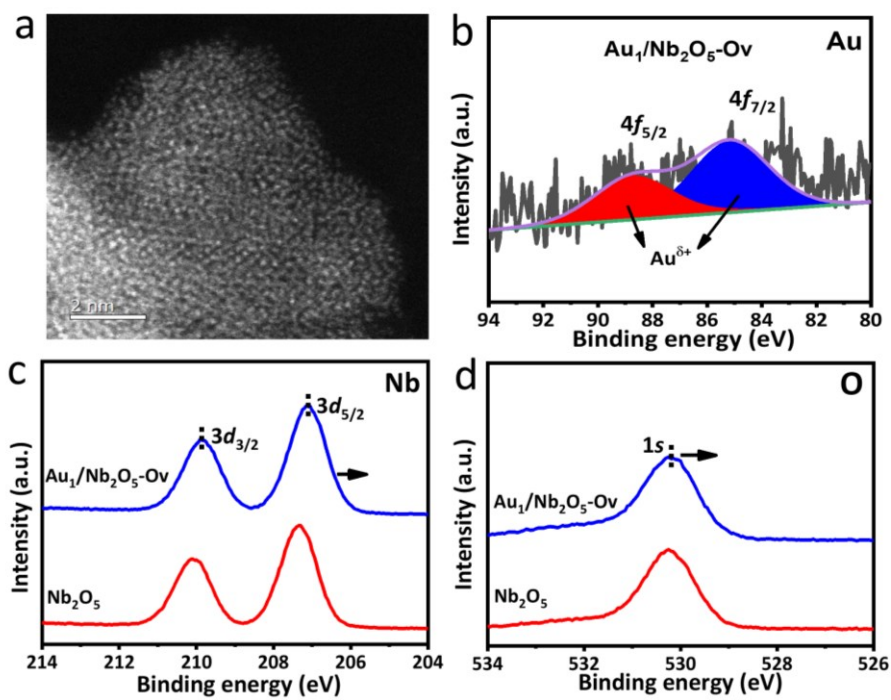

**Supplementary Fig. 12 AC-HAADF-STEM image and XPS pattern of Au<sub>1</sub>/Nb<sub>2</sub>O<sub>5</sub>-Ov.** (a) AC-HAADF-STEM image of Au<sub>1</sub>/Nb<sub>2</sub>O<sub>5</sub>-Ov. The XPS spectra of Au 4f(b), Nb 3d (c) and (d) O 1s of Nb<sub>2</sub>O<sub>5</sub> and Au<sub>1</sub>/Nb<sub>2</sub>O<sub>5</sub>-Ov.

**Supplementary Table 1. Structural parameters extracted from quantitative EXAFS curve-fitting.**

| Sample                                              | Shell  | C. N. | $\sigma^2/10^{-3}(\text{\AA}^2)$ | $E_0/\text{eV}$ | $R/\text{\AA}$ | R-factor |
|-----------------------------------------------------|--------|-------|----------------------------------|-----------------|----------------|----------|
| Pt foil                                             | Pt-Pt  | 12    | 4.63                             | 8.576           | 2.76           | 0.002    |
| PtO <sub>2</sub>                                    | Pt-O 1 | 2     | 3.10                             | 11.98           | 1.92           | 0.017    |
|                                                     | Pt-O 2 | 4     | 0.87                             | 11.98           | 2.02           |          |
|                                                     | Pt-Pt  | 2     | 3.80                             | 14.55           | 3.14           |          |
| Pt <sub>1</sub> /Nb <sub>2</sub> O <sub>5</sub> -Ov | Pt-O   | 2.11  | 2.93                             | 14.10           | 2.00           | 0.019    |
|                                                     | Pt-Nb  | 3.24  | 5.66                             | 12.15           | 2.92           |          |

EXAFS fitting details of Pt foil, PtO<sub>2</sub> and Pt<sub>1</sub>/Nb<sub>2</sub>O<sub>5</sub>-Ov, catalyst. The EXAFS data (k-range: -12.5  $\text{\AA}^{-1}$  and R-range: 1-3.3  $\text{\AA}$ ) were fitted in 1,2 and 3 k-weighted R-space. Amplitude reduction factors were evaluated for reference spectra.

**Supplementary Table 2. Catalytic Performances of Pt-Based Catalysts for the Conversion of HMF.**

| Entry | Catalyst                                            | T(°C) | P(MPa) | Product | Conv. (%) | Yield (%) | TOF (h <sup>-1</sup> ) | References |
|-------|-----------------------------------------------------|-------|--------|---------|-----------|-----------|------------------------|------------|
| 1     | Pt/C                                                | 120   | 6.2    | BHMF    | 11        | 2         | 21.3                   | 1          |
| 2     | Pt/MCM-41                                           | 35    | 0.8    | BHMF    | 100       | 98.9      | 386.3                  | 2          |
| 3     | Pt <sub>3</sub> Sn/SnO <sub>2</sub> /rGO            | 70    | 2      | BHMF    | >99       | >99       | 1308.0                 | 3          |
| 4     | Pt/AC                                               | 120   | 3      | DMF     | 67.4      | 32.6      | 33.7                   | 4          |
| 5     | Pt/rGO                                              | 120   | 2      | DMF     | 100       | 73.2      | 50.0                   | 4          |
| 6     | Pt/NaY                                              | 220   | 1.5    | DMF     | 100       | 30.4      | 195.1                  | 5          |
| 7     | PtCo@HCS <sup>a</sup>                               | 180   | 2      | DMF     | 100       | 98        | 32.5                   | 6          |
| 8     | Pt <sub>1</sub> /Nb <sub>2</sub> O <sub>5</sub> -Ov | 160   | 4      | MF      | >99       | >99       | 1875.3                 | This work  |

<sup>a</sup>HCS, hollow carbon spheres.

**Supplementary Table 3. Calculated the entropy and energy of each compound at the 413.15 K.**

|             | H <sub>2</sub> O | H <sub>2</sub> | HMF   | MF     | DMF    |
|-------------|------------------|----------------|-------|--------|--------|
| S/cal/mol/K | 45.08            | 31.13          | 90.51 | 84.18  | 81.81  |
| E/eV        | -14.22           | -88.7          | -6.76 | -94.95 | -89.97 |



**Supplementary Table 4. The hydrodeoxygenation of MF to DMF over Pt<sub>1</sub>/Nb<sub>2</sub>O<sub>5</sub>-Ov.**

| Entry | Catalyst                                            | Temperature (°C) | Time (h) | Conversion (%) | Yield (%) |
|-------|-----------------------------------------------------|------------------|----------|----------------|-----------|
| 1     | Pt <sub>1</sub> /Nb <sub>2</sub> O <sub>5</sub> -Ov | 160              | 2        | trace          | -         |

Reaction conditions: MF (0.3 mmol), catalyst (20 mg), solvent (THF 2 mL), H<sub>2</sub> pressure (4 MPa), stirring speed (600 rpm).

**Supplementary Table 5. Hydrodeoxygenation of different substrates over the Pt<sub>1</sub>/Nb<sub>2</sub>O<sub>5</sub>-Ov catalyst<sup>a</sup>.**

| Entry           | Substrate                                                                           | Temperature /<br>°C | Time /<br>h | Product                                                                              | Conversion<br>/ % | Yield.<br>/ % |
|-----------------|-------------------------------------------------------------------------------------|---------------------|-------------|--------------------------------------------------------------------------------------|-------------------|---------------|
| 1               | 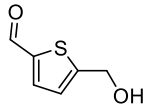   | 160                 | 4           |    | >99               | 98            |
| 2               |    | 160                 | 4           |    | >99               | >99           |
| 3               |    | 160                 | 4           |    | trace             | trace         |
| 4               |    | 160                 | 4           |     | >99               | >99           |
| 5               |    | 160                 | 4           |    | trace             | -             |
| 6               |    | 160                 | 6           |    | trace             | -             |
| 7 <sup>b</sup>  |    | 160                 | 1           |    | 24                | 24            |
| 8 <sup>b</sup>  |   | 160                 | 1           |   | 55                | 45            |
| 9 <sup>b</sup>  |  | 160                 | 1           |  | >99               | 23            |
| 10 <sup>c</sup> |  | 200                 | 6           |   | 11                | 9             |
| 11 <sup>c</sup> |  | 200                 | 6           |  | 26                | 14.6          |
|                 |                                                                                     |                     |             |  |                   | 11.4          |
| 12 <sup>b</sup> |  | 160                 | 2           |  | trace             | trace         |
| 13 <sup>b</sup> |  | 160                 | 4           |  | trace             | trace         |

[a] Reaction conditions: substrate (0.3 mmol), catalyst (20 mg), solvent (THF 2 mL), H<sub>2</sub> pressure (2.0 MPa), stirring speed (600 rpm). [b] solvent (ethanol 2 mL). [c] 10wt% solution (2 mL).

**Supplementary Table 6. The imaginary frequency of TS.**

| Structure | Frequency (cm <sup>-1</sup> ) |
|-----------|-------------------------------|
| TS1       | 971.15                        |
| TS2       | 319.98                        |

### Fractional coordinates for optimized DFT structures

Fractional coordinates are provided in CIF-format and are labeled according to the nomenclature introduced in Supplementary Fig. 8c. The structures with CIF-format can be found in the Supplementary Data 1.

#### AutoCreatByScript: O Nb Pt

1.0000000000000000

|                    |                    |                    |
|--------------------|--------------------|--------------------|
| 12.255509999999992 | 0.0000000000000000 | 0.0000000000000000 |
| 0.0000000000000000 | 11.438159999999999 | 0.0000000000000000 |
| 0.0000000000000000 | 0.0000000000000000 | 32.741559999999998 |

a=12.25551; b=11.43816; c=32.74156

alpha=90.00; beta=90.00; gamma=90.00

|     |    |    |
|-----|----|----|
| O   | Nb | Pt |
| 134 | 53 | 1  |

#### Selective dynamics

##### Direct

|                    |                    |                    |
|--------------------|--------------------|--------------------|
| 0.1046750000000003 | 0.1250980000000013 | 0.0005060000000014 |
| 0.4380080000000035 | 0.1250980000000013 | 0.0005060000000014 |
| 0.7713419999999971 | 0.1250980000000013 | 0.0005060000000014 |
| 0.1046750000000003 | 0.4584309999999974 | 0.0005060000000014 |
| 0.4380080000000035 | 0.4584309999999974 | 0.0005060000000014 |
| 0.7713419999999971 | 0.4584309999999974 | 0.0005060000000014 |
| 0.1046750000000003 | 0.7917649999999981 | 0.0005060000000014 |
| 0.4380080000000035 | 0.7917649999999981 | 0.0005060000000014 |
| 0.7713419999999971 | 0.7917649999999981 | 0.0005060000000014 |
| 0.2690119999999965 | 0.2918859999999981 | 0.0153400000000019 |
| 0.6023449999999997 | 0.2918859999999981 | 0.0153400000000019 |
| 0.9356790000000004 | 0.2918859999999981 | 0.0153400000000019 |
| 0.2690119999999965 | 0.6252190000000013 | 0.0153400000000019 |
| 0.6023449999999997 | 0.6252190000000013 | 0.0153400000000019 |
| 0.9356790000000004 | 0.6252190000000013 | 0.0153400000000019 |
| 0.2690119999999965 | 0.9585530000000020 | 0.0153400000000019 |
| 0.6023449999999997 | 0.9585530000000020 | 0.0153400000000019 |
| 0.9356790000000004 | 0.9585530000000020 | 0.0153400000000019 |
| 0.1019549999999967 | 0.2917440000000013 | 0.0736300000000014 |
| 0.4352879999999999 | 0.2917440000000013 | 0.0736300000000014 |
| 0.7686210000000031 | 0.2917440000000013 | 0.0736300000000014 |
| 0.1019549999999967 | 0.6250769999999974 | 0.0736300000000014 |
| 0.4352879999999999 | 0.6250769999999974 | 0.0736300000000014 |
| 0.7686210000000031 | 0.6250769999999974 | 0.0736300000000014 |
| 0.1019549999999967 | 0.9584100000000007 | 0.0736300000000014 |
| 0.4352879999999999 | 0.9584100000000007 | 0.0736300000000014 |
| 0.7686210000000031 | 0.9584100000000007 | 0.0736300000000014 |

|                    |                    |                    |
|--------------------|--------------------|--------------------|
| 0.268205999999993  | 0.291907000000019  | 0.131928000000020  |
| 0.601539000000025  | 0.291907000000019  | 0.131928000000020  |
| 0.934871999999986  | 0.291907000000019  | 0.131928000000020  |
| 0.268205999999993  | 0.625241000000026  | 0.131928000000020  |
| 0.601539000000025  | 0.625241000000026  | 0.131928000000020  |
| 0.934871999999986  | 0.625241000000026  | 0.131928000000020  |
| 0.268205999999993  | 0.958573999999987  | 0.131928000000020  |
| 0.601539000000025  | 0.958573999999987  | 0.131928000000020  |
| 0.934871999999986  | 0.958573999999987  | 0.131928000000020  |
| 0.099246000000008  | 0.125086000000031  | 0.146762000000025  |
| 0.432580000000015  | 0.125086000000031  | 0.146762000000025  |
| 0.765912999999976  | 0.125086000000031  | 0.146762000000025  |
| 0.099246000000008  | 0.458418999999992  | 0.146762000000025  |
| 0.432580000000015  | 0.458418999999992  | 0.146762000000025  |
| 0.765912999999976  | 0.458418999999992  | 0.146762000000025  |
| 0.099246000000008  | 0.791752000000025  | 0.146762000000025  |
| 0.432580000000015  | 0.791752000000025  | 0.146762000000025  |
| 0.765912999999976  | 0.791752000000025  | 0.146762000000025  |
| 0.0967384831806638 | 0.2919264668021148 | 0.1984400293401334 |
| 0.7633702939764444 | 0.2918463737024006 | 0.1982576030819374 |
| 0.0971206506621761 | 0.6250909529761465 | 0.1983878578118828 |
| 0.7634294359203646 | 0.6250966884819221 | 0.1982460873406816 |
| 0.0966932167884315 | 0.9582605589000740 | 0.1984300736910830 |
| 0.7633422942710378 | 0.9583447604589306 | 0.1982478609843255 |
| 0.4297374153903777 | 0.2919142787076252 | 0.1983488579934903 |
| 0.4298853475262861 | 0.6250941586259811 | 0.1983060467367977 |
| 0.4297712531649505 | 0.9582517621830781 | 0.1983427581346141 |
| 0.9279896457040449 | 0.1250987434243782 | 0.2131721172285505 |
| 0.5949145351940190 | 0.4584154001893054 | 0.2134919369321027 |
| 0.9287486032954083 | 0.4585397009892780 | 0.2136394736799698 |
| 0.5949168655922191 | 0.7918382706848894 | 0.2134986203349254 |
| 0.2604870360221487 | 0.1250587220288560 | 0.2131724963624038 |
| 0.5947379109047489 | 0.1251159969797582 | 0.2132821556504050 |
| 0.9287548278316127 | 0.7916380197975730 | 0.2136479386291137 |
| 0.2614669053601289 | 0.4583511239489104 | 0.2136241332619642 |
| 0.2614724407113575 | 0.7918740188883564 | 0.2136203968619255 |
| 0.0953750192939599 | 0.1250693949496435 | 0.2715405390907309 |
| 0.0971147257918388 | 0.4596204952264579 | 0.2718951093591232 |
| 0.7634517416280708 | 0.4585604165740847 | 0.2713297929615547 |
| 0.7634646167677192 | 0.7915705068191381 | 0.2713295617947069 |
| 0.0971304490535625 | 0.7904640380633817 | 0.2718950335460938 |
| 0.7632650214719167 | 0.1250583530656517 | 0.2713001901858339 |
| 0.4287934200799147 | 0.1250510725788244 | 0.2710733326445434 |
| 0.4296972187371549 | 0.4603203353797182 | 0.2717287006656023 |

|                    |                    |                    |
|--------------------|--------------------|--------------------|
| 0.4296637932954322 | 0.7897674883628688 | 0.2717353462084565 |
| 0.9319189361880247 | 0.4585762443060655 | 0.3295517284746268 |
| 0.9319165758150081 | 0.7915576413163434 | 0.3295637208441026 |
| 0.9308058116940464 | 0.1250439463269523 | 0.3294885750261653 |
| 0.2635185682498307 | 0.1250808948761115 | 0.3291619754539143 |
| 0.2646192950144067 | 0.7911650629360718 | 0.3300675558900302 |
| 0.5980910335082473 | 0.1250352245843126 | 0.3290300291172414 |
| 0.2646234202365119 | 0.4589115597625991 | 0.3300530164015094 |
| 0.5989311299406582 | 0.4594414149297243 | 0.3295998084379418 |
| 0.5989502571743724 | 0.7906487414441394 | 0.3295896953984611 |
| 0.0984038125335431 | 0.6250457919591238 | 0.3467621836557412 |
| 0.7653917003672691 | 0.6250401390263491 | 0.3449407998099518 |
| 0.0961943523013620 | 0.2922147753276315 | 0.3451519070453558 |
| 0.0962023216426950 | 0.9578989733830036 | 0.3451426884650150 |
| 0.7629578203353753 | 0.2915987060124003 | 0.3444569939178252 |
| 0.7629555862741287 | 0.9584858186792228 | 0.3444588727456003 |
| 0.4305134026630895 | 0.6250478559657293 | 0.3455502428024928 |
| 0.4290752554803171 | 0.2925120667009361 | 0.3440310428832525 |
| 0.4290599888767632 | 0.9575799936111200 | 0.3440272752333387 |
| 0.4246901410599921 | 0.1250470160755480 | 0.3940376652039960 |
| 0.0952249583435874 | 0.7916932883949042 | 0.3974546254629856 |
| 0.0952886426134878 | 0.4584130692123413 | 0.3974585186373547 |
| 0.7617019902256740 | 0.4584301540717542 | 0.3955905980373277 |
| 0.7616804484742511 | 0.7916455246705656 | 0.3955893843150073 |
| 0.0921254821265388 | 0.1250492868105925 | 0.3960578745257074 |
| 0.7598696712238603 | 0.1250392432599752 | 0.3964994427224630 |
| 0.4285716792412718 | 0.7922050860278211 | 0.3968042906576499 |
| 0.4285356387150160 | 0.4578874466522357 | 0.3967970915090651 |
| 0.9324303803556799 | 0.6250174527108168 | 0.4133414922763171 |
| 0.9241819980998438 | 0.2920988843618146 | 0.4111505904056120 |
| 0.9241796000060032 | 0.9579773813058946 | 0.4111547693554463 |
| 0.2636559533761375 | 0.6250408339289625 | 0.4159515500451852 |
| 0.5914775448173848 | 0.2913170631876459 | 0.4095032404490519 |
| 0.5914643946360106 | 0.9587851749490137 | 0.4095004755538910 |
| 0.2564817037160334 | 0.2918066407754727 | 0.4121595503737812 |
| 0.2564717510037164 | 0.9582458408300001 | 0.4121553641068004 |
| 0.5966481006185710 | 0.6250306095885789 | 0.4129600395285075 |
| 0.0997555617931737 | 0.6250564508808697 | 0.4730802251252829 |
| 0.7725003651296061 | 0.6250583609492170 | 0.4684890110233368 |
| 0.4292371055069948 | 0.2788086520199484 | 0.4676184917585288 |
| 0.4292252938172117 | 0.9714850192542571 | 0.4676097684462406 |
| 0.7522710481620022 | 0.3005063555074715 | 0.4694829809991091 |
| 0.7522512579070352 | 0.9495712541602809 | 0.4694792091614182 |
| 0.0848564676180657 | 0.2854729613920871 | 0.4702366964737550 |

|                    |                    |                    |
|--------------------|--------------------|--------------------|
| 0.0848752556488260 | 0.9647111163755776 | 0.4702371578426683 |
| 0.4393291162343874 | 0.6250697596549193 | 0.4714142702747652 |
| 0.2314791599114371 | 0.6249246385393541 | 0.5563379522861980 |
| 0.9322118840212770 | 0.6250762303095226 | 0.5414169326501056 |
| 0.2397825289283950 | 0.2769578301455380 | 0.5352191987249559 |
| 0.2397961798760778 | 0.9731678054555774 | 0.5352291992225030 |
| 0.5728510430959460 | 0.3043965376899503 | 0.5389456559204148 |
| 0.5728736782126918 | 0.9457552098110376 | 0.5389223153526921 |
| 0.3862237883151764 | 0.4502418319895083 | 0.5277218207415386 |
| 0.3862684189367631 | 0.7999890579058885 | 0.5276946388191776 |
| 0.7290064651582545 | 0.1250684502870615 | 0.5337912477647183 |
| 0.8857050551941681 | 0.3001860051783070 | 0.5411788035341618 |
| 0.8857903806801317 | 0.9499920046897491 | 0.5411324548705234 |
| 0.7309232154813737 | 0.7708008762808352 | 0.5403624398863778 |
| 0.7309131894517608 | 0.4794444045610722 | 0.5403565127446199 |
| 0.0602818576864900 | 0.1250415846896321 | 0.5432595443091922 |
| 0.0794896902960987 | 0.4526347691003026 | 0.5389850883974350 |
| 0.0795656213127501 | 0.7974344343726947 | 0.5389865014831875 |
| 0.4131966938617996 | 0.1250790315110344 | 0.5396000313261838 |
| 0.4137089999999972 | 0.2918140000000022 | 0.0158879999999968 |
| 0.7470420000000004 | 0.2918140000000022 | 0.0158879999999968 |
| 0.0803749999999965 | 0.2918140000000022 | 0.0158879999999968 |
| 0.4137089999999972 | 0.6251469999999983 | 0.0158879999999968 |
| 0.7470420000000004 | 0.6251469999999983 | 0.0158879999999968 |
| 0.0803749999999965 | 0.6251469999999983 | 0.0158879999999968 |
| 0.4137089999999972 | 0.9584809999999990 | 0.0158879999999968 |
| 0.7470420000000004 | 0.9584809999999990 | 0.0158879999999968 |
| 0.0803749999999965 | 0.9584809999999990 | 0.0158879999999968 |
| 0.1235250000000008 | 0.2918209999999988 | 0.1313790000000026 |
| 0.4568579999999969 | 0.2918209999999988 | 0.1313790000000026 |
| 0.7901909999999930 | 0.2918209999999988 | 0.1313790000000026 |
| 0.1235250000000008 | 0.6251540000000020 | 0.1313790000000026 |
| 0.4568579999999969 | 0.6251540000000020 | 0.1313790000000026 |
| 0.7901909999999930 | 0.6251540000000020 | 0.1313790000000026 |
| 0.1235250000000008 | 0.9584880000000027 | 0.1313790000000026 |
| 0.4568579999999969 | 0.9584880000000027 | 0.1313790000000026 |
| 0.7901909999999930 | 0.9584880000000027 | 0.1313790000000026 |
| 0.7395591494270229 | 0.7917615370150367 | 0.2135775210643072 |
| 0.7393193094367616 | 0.1250971830347171 | 0.2135326479956673 |
| 0.0727085108702307 | 0.1250961388978760 | 0.2137435493781770 |
| 0.7395545254852981 | 0.4584330543074255 | 0.2135765957587169 |
| 0.0734816091941921 | 0.4585314083764631 | 0.2139952591726909 |
| 0.0734866378569975 | 0.7916553095893017 | 0.2139942706924708 |
| 0.4052592422640552 | 0.1250766376594291 | 0.2135549136591275 |

|                    |                    |                    |
|--------------------|--------------------|--------------------|
| 0.4062455735296422 | 0.4585776163116938 | 0.2140753199105416 |
| 0.4062570249189277 | 0.7915921156634166 | 0.2140775250399568 |
| 0.1200484072910713 | 0.4586358115636681 | 0.3295674323315809 |
| 0.7870506836990887 | 0.4579818790290721 | 0.3288309346962276 |
| 0.7870507137009517 | 0.7921077287478379 | 0.3288330729734987 |
| 0.1200470128132743 | 0.7914645541610899 | 0.3295678121372028 |
| 0.1189888664478994 | 0.1250540466493206 | 0.3291913379338003 |
| 0.7860121966917453 | 0.1250425281332521 | 0.3288268172213810 |
| 0.4532477832332356 | 0.1250478899739614 | 0.3287969204144091 |
| 0.4539675700861148 | 0.7901252491618805 | 0.3296027371488895 |
| 0.4539495625044627 | 0.4599646772188165 | 0.3296005717843108 |
| 0.0769208367745501 | 0.6250460580232340 | 0.4134048907518539 |
| 0.7411872834698831 | 0.6250360301255641 | 0.4110987028679308 |
| 0.7356103076924343 | 0.2921007867769403 | 0.4112570435984067 |
| 0.7355956825001237 | 0.9579842241330444 | 0.4112528134674037 |
| 0.0690161888471004 | 0.9588544391867516 | 0.4120592244861557 |
| 0.0690198101829151 | 0.2912489741854610 | 0.4120575271073536 |
| 0.4016537683121231 | 0.2910915181319456 | 0.4108897864050834 |
| 0.4016461487872588 | 0.9590088481320332 | 0.4108859125119871 |
| 0.4095520558188090 | 0.6250456753202298 | 0.4151885685610323 |
| 0.0926835913737988 | 0.6250698141443869 | 0.5300641591856180 |
| 0.7866195387748985 | 0.6250999974300260 | 0.5258380981222645 |
| 0.4266710020462290 | 0.9575244020455012 | 0.5253330434976995 |
| 0.4266215587991636 | 0.2928084395724801 | 0.5253414101832371 |
| 0.7455374675494134 | 0.2941225059012527 | 0.5270402579101339 |
| 0.7455855954516731 | 0.9560020376456498 | 0.5270320813265934 |
| 0.0961956434334530 | 0.2871868952673686 | 0.5277857786230936 |
| 0.0962110145530493 | 0.9629538965037145 | 0.5277860229205410 |
| 0.3667232892220451 | 0.6251986412025610 | 0.5245968267100587 |



### Supplementary References

1. Chidambaram, M. & Bell, A. T. A two-step approach for the catalytic conversion of glucose to 2,5-dimethylfuran in ionic liquids. *Green Chem.* **12**, 1253–1262 (2010).
2. Chatterjee, M., Ishizaka, T. & Kawanami, H. Selective hydrogenation of 5-hydroxymethylfurfural to 2,5-bis-(hydroxymethyl)furan using Pt/MCM-41 in an aqueous medium: a simple approach. *Green Chem.* **16**, 4734–4739 (2014).
3. Shi, J., Zhang, M., Du, W., Ning, W. & Hou, Z. SnO<sub>2</sub>-isolated Pt<sub>3</sub>Sn alloy on reduced graphene oxide: an efficient catalyst for selective hydrogenation of CO in unsaturated aldehydes. *Catal. Sci. Technol.* **5**, 3108–3112 (2015).
4. Shi, J., Wang, Y., Yu, X., Du, W. & Hou, Z. Production of 2,5-dimethylfuran from 5-hydroxymethylfurfural over reduced graphene oxides supported Pt catalyst under mild conditions. *Fuel* **163**, 74–79 (2016).
5. Nagpure, A. S., Lucas, N. & Chilukuri, S. V. Efficient preparation of liquid fuel 2,5-dimethylfuran from biomass-derived 5-hydroxymethylfurfural over Ru-NaY catalyst. *ACS Sustainable Chem. Eng.* **3**, 2909–2916 (2015).
6. Wang, G. H. et al. Platinum-cobalt bimetallic nanoparticles in hollow carbon nanospheres for hydrogenolysis of 5-hydroxymethylfurfural. *Nat. Mater.* **13**, 293–300 (2014).
